# Supplementary material
Source: publisher site journal article supplement (https://www.dovepress.com/article/318589)
Supplement: Supplementary file 1 [file get_supplementary_file.php]

## Supplementary Table 1. Transition Probabilities (Control)

| **FROM HEALTH STATE** | **TRANSIT TO HEALTH STATE** | | | | | **TIME RANGE** |
| --- | --- | --- | --- | --- | --- | --- |
|  | **Minimal** | **Moderate** | **Severe** | **Crippled** | **Bedbound** |  |
| **Minimal** | 1.000 | 0.000 | 0.000 | 0.000 | 0.000 | Baseline-Surgery |
| 0.792 | 0.083 | 0.125 | 0.000 | 0.000 | Surgery-6W |
| 0.792 | 0.083 | 0.069 | 0.028 | 0.028 | 6W-3M |
| 0.792 | 0.153 | 0.042 | 0.014 | 0.000 | 3M-9M |
| 0.863 | 0.082 | 0.014 | 0.041 | 0.000 | 6M-9M |
| 0.890 | 0.068 | 0.027 | 0.000 | 0.014 | 9M-1YR |
| 0.815 | 0.086 | 0.062 | 0.025 | 0.012 | 1YR-18M |
| 0.792 | 0.083 | 0.069 | 0.028 | 0.028 | 18M-2YR |
| 0.743 | 0.143 | 0.086 | 0.029 | 0.000 | 2YR-2YR+ |
| **Moderate** | 0.000 | 0.778 | 0.222 | 0.000 | 0.000 | Baseline-Surgery |
| 0.484 | 0.419 | 0.097 | 0.000 | 0.000 | Surgery-6W |
| 0.371 | 0.514 | 0.057 | 0.057 | 0.000 | 6W-3M |
| 0.419 | 0.258 | 0.194 | 0.129 | 0.000 | 3M- 6M |
| 0.217 | 0.522 | 0.130 | 0.130 | 0.000 | 6M-9M |
| 0.417 | 0.333 | 0.167 | 0.083 | 0.000 | 9M-1YR |
| 0.353 | 0.412 | 0.118 | 0.059 | 0.059 | 1YR-18M |
| 0.371 | 0.514 | 0.057 | 0.057 | 0.000 | 18M-2YR |
| 0.625 | 0.000 | 0.000 | 0.375 | 0.000 | 2YR-2YR+ |
| **Severe** | 0.366 | 0.220 | 0.341 | 0.049 | 0.024 | Baseline-Surgery |
| 0.351 | 0.351 | 0.189 | 0.108 | 0.000 | Surgery-6W |
| 0.227 | 0.227 | 0.227 | 0.227 | 0.091 | 6W-3M |
| 0.333 | 0.200 | 0.400 | 0.067 | 0.000 | 3M-6M |
| 0.105 | 0.316 | 0.368 | 0.211 | 0.000 | 6M-9M |
| 0.154 | 0.231 | 0.154 | 0.385 | 0.077 | 9M-1YR |
| 0.200 | 0.200 | 0.200 | 0.200 | 0.200 | 1YR-18M |
| 0.227 | 0.227 | 0.227 | 0.227 | 0.091 | 18M-2YR |
| 0.250 | 0.500 | 0.250 | 0.000 | 0.000 | 2YR-2YR+ |
| **Crippled** | 0.316 | 0.228 | 0.263 | 0.175 | 0.018 | Baseline-Surgery |
| 0.222 | 0.111 | 0.333 | 0.278 | 0.056 | Surgery-6W |
| 0.000 | 0.000 | 0.200 | 0.700 | 0.100 | 6W-3M |
| 0.067 | 0.133 | 0.333 | 0.333 | 0.133 | 3M-6M |
| 0.200 | 0.100 | 0.200 | 0.300 | 0.200 | 6M-9M |
| 0.154 | 0.154 | 0.308 | 0.308 | 0.077 | 9M-1YR |
| 0.083 | 0.083 | 0.417 | 0.250 | 0.167 | 1YR-18M |
| 0.000 | 0.000 | 0.200 | 0.700 | 0.100 | 18M-2YR |
| 0.000 | 0.200 | 0.600 | 0.200 | 0.000 | 2YR-2YR+ |
| **Bedbound** | 0.326 | 0.065 | 0.174 | 0.152 | 0.283 | Baseline-Surgery |
| 0.500 | 0.214 | 0.143 | 0.143 | 0.000 | Surgery-6W |
| 0.000 | 1.000 | 0.000 | 0.000 | 0.000 | 6W-3M |
| 0.500 | 0.250 | 0.000 | 0.250 | 0.000 | 3M-6M |
| 0.000 | 0.000 | 0.500 | 0.000 | 0.500 | 6M-9M |
| 0.000 | 0.000 | 0.000 | 0.667 | 0.333 | 9M-1YR |
| 0.000 | 0.333 | 0.000 | 0.333 | 0.333 | 1YR-18M |
| 0.000 | 1.000 | 0.000 | 0.000 | 0.000 | 18M-2YR |
| 0.000 | 0.000 | 0.000 | 0.000 | 1.000 | 2YR-2YR+ |

Supplementary Table 2. Transition Probabilities (i-Factor)

| **FROM HEALTH STATE** | **TRANSIT TO HEALTH STATE** | | | | | **TIME RANGE** |
| --- | --- | --- | --- | --- | --- | --- |
|  | **Minimal** | **Moderate** | **Severe** | **Crippled** | **Bedbound** |  |
| **Minimal** | 0.500 | 0.000 | 0.500 | 0.000 | 0.000 | Baseline-Surgery |
| 0.714 | 0.089 | 0.107 | 0.071 | 0.018 | Surgery-6W |
| 0.816 | 0.133 | 0.031 | 0.020 | 0.000 | 6W-3M |
| 0.890 | 0.077 | 0.022 | 0.011 | 0.000 | 3M-9M |
| 0.860 | 0.070 | 0.058 | 0.000 | 0.012 | 6M-9M |
| 0.765 | 0.160 | 0.062 | 0.012 | 0.000 | 9M-1YR |
| 0.882 | 0.103 | 0.015 | 0.000 | 0.000 | 1YR-18M |
| 0.816 | 0.133 | 0.031 | 0.020 | 0.000 | 18M-2YR |
| 0.814 | 0.093 | 0.047 | 0.023 | 0.023 | 2YR-2YR+ |
| **Moderate** | 0.429 | 0.500 | 0.071 | 0.000 | 0.000 | Baseline-Surgery |
| 0.730 | 0.162 | 0.081 | 0.000 | 0.027 | Surgery-6W |
| 0.364 | 0.455 | 0.136 | 0.045 | 0.000 | 6W-3M |
| 0.448 | 0.345 | 0.172 | 0.000 | 0.034 | 3M- 6M |
| 0.348 | 0.348 | 0.304 | 0.000 | 0.000 | 6M-9M |
| 0.400 | 0.300 | 0.200 | 0.100 | 0.000 | 9M-1YR |
| 0.364 | 0.455 | 0.136 | 0.045 | 0.000 | 1YR-18M |
| 0.273 | 0.455 | 0.091 | 0.091 | 0.091 | 18M-2YR |
| 0.714 | 0.000 | 0.143 | 0.143 | 0.000 | 2YR-2YR+ |
| **Severe** | 0.441 | 0.265 | 0.206 | 0.088 | 0.000 | Baseline-Surgery |
| 0.563 | 0.188 | 0.156 | 0.094 | 0.000 | Surgery-6W |
| 0.381 | 0.286 | 0.190 | 0.095 | 0.048 | 6W-3M |
| 0.167 | 0.333 | 0.417 | 0.083 | 0.000 | 3M-6M |
| 0.100 | 0.300 | 0.300 | 0.300 | 0.000 | 6M-9M |
| 0.167 | 0.167 | 0.611 | 0.000 | 0.056 | 9M-1YR |
| 0.450 | 0.250 | 0.200 | 0.050 | 0.050 | 1YR-18M |
| 0.381 | 0.286 | 0.190 | 0.095 | 0.048 | 18M-2YR |
| 0.000 | 0.333 | 0.333 | 0.333 | 0.000 | 2YR-2YR+ |
| **Crippled** | 0.271 | 0.257 | 0.200 | 0.257 | 0.014 | Baseline-Surgery |
| 0.500 | 0.208 | 0.208 | 0.083 | 0.000 | Surgery-6W |
| 0.167 | 0.083 | 0.333 | 0.417 | 0.000 | 6W-3M |
| 0.091 | 0.364 | 0.182 | 0.182 | 0.182 | 3M-6M |
| 0.200 | 0.000 | 0.200 | 0.200 | 0.400 | 6M-9M |
| 0.000 | 0.000 | 0.000 | 0.750 | 0.250 | 9M-1YR |
| 0.200 | 0.200 | 0.000 | 0.400 | 0.200 | 1YR-18M |
| 0.167 | 0.083 | 0.333 | 0.417 | 0.000 | 18M-2YR |
| 0.000 | 0.000 | 0.000 | 1.000 | 0.000 | 2YR-2YR+ |
| **Bedbound** | 0.356 | 0.067 | 0.244 | 0.089 | 0.244 | Baseline-Surgery |
| 0.333 | 0.083 | 0.167 | 0.333 | 0.083 | Surgery-6W |
| 0.000 | 0.000 | 0.000 | 0.333 | 0.667 | 6W-3M |
| 0.000 | 0.333 | 0.000 | 0.333 | 0.333 | 3M-6M |
| 0.000 | 0.500 | 0.500 | 0.000 | 0.000 | 6M-9M |
| 0.333 | 0.000 | 0.000 | 0.333 | 0.333 | 9M-1YR |
| 0.500 | 0.000 | 0.000 | 0.000 | 0.500 | 1YR-18M |
| 0.000 | 0.000 | 0.000 | 0.333 | 0.667 | 18M-2YR |
| - | - | - | - | - | 2YR-2YR+ |

Supplementary Table 3. Medication Aggregated Costs per Health Status

| **TIME INTERVALS** | **Minimal** | **Moderate** | **Severe** | **Crippled** | **Bedbound** |
| --- | --- | --- | --- | --- | --- |
| 1M | $42.49 | $60.53 | $83.07 | $106.42 | $164.34 |
| 6W | $63.74 | $90.80 | $124.61 | $159.63 | $246.51 |
| 3M | $127.47 | $181.59 | $249.21 | $319.26 | $493.02 |
| 6M | $254.94 | $363.18 | $498.42 | $638.52 | $986.04 |
| 12M | $509.88 | $726.36 | $996.84 | $1,277.04 | $1,972.08 |

Supplementary Table 4. Return to Work Probability Scenarios

| **Control** | | | | | |
| --- | --- | --- | --- | --- | --- |
| TIME RANGE | *No restrictions* | *Few restrictions* | *Many restrictions* | *Unable* | *NA* |
| PostOP-6M | 0.428 | 0.359 | 0.027 | 0.172 | 0.014 |
| 6M-9M | 0.438 | 0.367 | 0.055 | 0.117 | 0.023 |
| 9M-12M | 0.457 | 0.393 | 0.05 | 0.1 | 0 |
| 12M-18M | 0.441 | 0.37 | 0.055 | 0.134 | 0 |
| 18M-24M | 0.457 | 0.378 | 0.047 | 0.118 | 0 |
| **i-Factor** | | | | | |
| TIME RANGE | *No restrictions* | *Few restrictions* | *Many restrictions* | *Unable* | *NA* |
| PostOP-6M | 0.426 | 0.392 | 0.02 | 0.155 | 0.007 |
| 6M-9M | 0.481 | 0.336 | 0.008 | 0.175 | 0 |
| 9M-12M | 0.446 | 0.389 | 0.029 | 0.136 | 0 |
| 12M-18M | 0.47 | 0.345 | 0.017 | 0.168 | 0 |
| 18M-24M | 0.462 | 0.387 | 0.025 | 0.126 | 0 |

Supplementary Table 5. Quality of Life Estimate per Health Status

| **Quality of Life (SF36)** | **Mean** | **SD** |
| --- | --- | --- |
| *Minimal* | 0.755 | 0.124 |
| *Moderate* | 0.638 | 0.103 |
| *Severe* | 0.588 | 0.092 |
| *Crippled* | 0.534 | 0.088 |
| *Bedbound* | 0.499 | 0.092 |

## Supplementary Table 6. Net Monetary Benefit (Both Perspectives)

|  |  | **P-15** | | **Control** | | **NMB, based on three WTP thresholds b** | | |
| --- | --- | --- | --- | --- | --- | --- | --- | --- |
|  | TIME HORIZON | *Cost a* | *QALY* | *Cost* | *QALY* | WTP = $50,000 | WTP = $100,000 | WTP = $150,000 |
| HEALTH SYSTEMS | 90 Day | $32,283.00 | 0.1999 | $32,202.87 | 0.1939 | $220.00 | $520.00 | $820.00 |
| 1 Year | $46,029.00 | 0.7789 | $46,996.71 | 0.7584 | $1,993.00 | $3,018.00 | $4,043.00 |
| 2 Year | $55,706.00 | 1.4240 | $57,389.24 | 1.3856 | $3,603.00 | $5,523.00 | $7,443.00 |
| 6 Year (Extrapolated) | $74,678.00 | 2.6458 | $77,805.38 | 2.5641 | $7,212.00 | $11,297.00 | $15,382.00 |
| 10 Year (Extrapolated) | $128,475.00 | 5.7838 | $135,861.28 | 5.5599 | $18,581.00 | $29,776.00 | $40,971.00 |
| SOCIETAL | 90 Day | $35,374.00 | 0.1999 | $35,423.19 | 0.1939 | $349.00 | $649.00 | $949.00 |
| 1 Year | $57,970.00 | 0.7789 | $58,818.63 | 0.7584 | $1,874.00 | $2,899.00 | $3,924.00 |
| 2 Year | $78,646.00 | 1.4240 | $80,307.29 | 1.3856 | $3,581.00 | $5,501.00 | $7,421.00 |
| 6 Year (Extrapolated) | $117,494.00 | 2.6458 | $120,958.84 | 2.5641 | $7,550.00 | $11,635.00 | $15,720.00 |
| 10 Year (Extrapolated) | $222,178.00 | 5.7838 | $230,822.49 | 5.5599 | $19,839.00 | $31,034.00 | $42,229.00 |

a Includes P-15 cost in the initial surgery

b NMB = ∆QALY *WTP threshold - ∆Cost

Supplementary Table 7. Case Based Complications in the Cohort

| **Result** | **% Cohort** | |
| --- | --- | --- |
| **COMPLICATIONS** | **Autograft** | **i-Factor** |
| **Major Complications** |  |  |
| 90 Day | 2.08% | 1.88% |
| 1 Year | 2.06% | 1.86% |
| 2 Year | 2.04% | 1.85% |
| 6 Year | 2.01% | 1.82% |
| 10 Year | 1.88% | 1.70% |
| **Minor Complications** |  |  |
| 90 Day | 14.36% | 13.57% |
| 1 Year | 14.21% | 13.43% |
| 2 Year | 14.11% | 13.33% |
| 6 Year | 13.86% | 13.10% |
| 10 Year | 12.96% | 12.24% |
| **No Complications** |  |  |
| 90 Day | 82.61% | 83.60% |
| 1 Year | 81.76% | 82.74% |
| 2 Year | 81.13% | 82.11% |
| 6 Year | 79.72% | 80.67% |
| 10 Year | 74.53% | 75.42% |

Supplementary Table 8. Case Based Re-Interventions Predicted for the Complications

|  | **% Cohort** | |
| --- | --- | --- |
|  | **Autograft** | **i-Factor** |
| **SUBSEQUENT INTERVENTIONS** | | |
| **Conservative Care** |  |  |
| 90 Day | 13.62% | 13.29% |
| 1 Year | 13.49% | 13.15% |
| 2 Year | 13.38% | 13.05% |
| 6 Year | 13.15% | 12.82% |
| 10 Year | 12.29% | 11.99% |
| **Require Surgery** |  |  |
| 90 Day | 2.82% | 2.16% |
| 1 Year | 2.79% | 2.14% |
| 2 Year | 2.77% | 2.12% |
| 6 Year | 2.72% | 2.09% |
| 10 Year | 2.54% | 1.95% |
| *Removal* |  |  |
| 90 Day | 0.00% | 0.00% |
| 1 Year | 0.00% | 0.00% |
| 2 Year | 0.00% | 0.00% |
| 6 Year | 0.04% | 0.04% |
| 10 Year | 0.04% | 0.03% |
| *Reoperation* |  |  |
| 90 Day | 0.00% | 0.00% |
| 1 Year | 0.00% | 0.00% |
| 2 Year | 0.00% | 0.02% |
| 6 Year | 0.02% | 0.00% |
| 10 Year | 0.02% | 0.00% |
| *Revision* |  |  |
| 90 Day | 0.00% | 0.00% |
| 1 Year | 0.04% | 0.00% |
| 2 Year | 0.04% | 0.02% |
| 6 Year | 0.02% | 0.01% |
| 10 Year | 0.02% | 0.01% |
| *Supplemental Fixation* |  |  |
| 90 Day | 0.00% | 0.00% |
| 1 Year | 0.00% | 0.02% |
| 2 Year | 0.00% | 0.04% |
| 6 Year | 0.04% | 0.01% |
| 10 Year | 0.04% | 0.01% |
| *Other* |  |  |
| 90 Day | 2.82% | 2.16% |
| 1 Year | 2.74% | 2.12% |
| 2 Year | 2.72% | 2.05% |
| 6 Year | 2.60% | 2.03% |
| 10 Year | 2.43% | 1.90% |

Supplementary Table 9. Case Based Health State

|  | **% Cohort** | |
| --- | --- | --- |
| **HEALTH STATE** | **Autograft** | **i-Factor** |
| **Minimal** |  |  |
| 90 Day | 41.21% | 54.42% |
| 1 Year | 56.92% | 55.92% |
| 2 Year | 51.55% | 63.08% |
| 6 Year | 48.41% | 60.83% |
| 10 Year | 43.92% | 57.41% |
| **Moderate** |  |  |
| 90 Day | 21.42% | 19.99% |
| 1 Year | 14.84% | 17.03% |
| 2 Year | 22.09% | 18.90% |
| 6 Year | 20.10% | 19.87% |
| 10 Year | 18.96% | 18.75% |
| **Severe** |  |  |
| 90 Day | 12.29% | 11.98% |
| 1 Year | 10.23% | 16.35% |
| 2 Year | 9.19% | 7.23% |
| 6 Year | 9.45% | 8.08% |
| 10 Year | 9.08% | 7.51% |
| **Crippled** |  |  |
| 90 Day | 31.46% | 14.76% |
| 1 Year | 21.35% | 11.40% |
| 2 Year | 23.97% | 11.99% |
| 6 Year | 29.14% | 11.61% |
| 10 Year | 29.00% | 10.49% |
| **Bedbound** |  |  |
| 90 Day | 7.42% | 5.96% |
| 1 Year | 10.71% | 6.17% |
| 2 Year | 6.93% | 4.61% |
| 6 Year | 7.27% | 2.73% |
| 10 Year | 7.00% | 2.16% |

Supplementary Table 10. Threshold Analysis of i-Factor on Initial Surgery Cost

|  | Initial ICER (without cost increase) | Maximum ∆cost of i-Factor allowed while maintaining cost-effective status | | |
| --- | --- | --- | --- | --- |
| WTP=$50,000 | WTP=$100,000 | WTP=$150,000 |
| **i-Factor cost-effective over control** | | | | |
| Base Case | -$23,261 | $2,433 | $52,433 | $102,433 |
| All Medicare | -$31,520 | $1,877 | $51,877 | $101,877 |
| All Privately Insured | -$60,482 | $2,988 | $52,988 | $102,988 |
| All Outpatient | -$23,261 | $2,433* | $52,433* | $102,433* |
| 50/50 Inpatient/Outpatient | -$46,001 | $2,433* | $52,433* | $102,433* |

*The P-15 strategy continues to dominate over the control while yielding the same ICER and NMB in these alternate settings, due to equal changes in cost in both groups.

Supplementary Figure 1. Health States


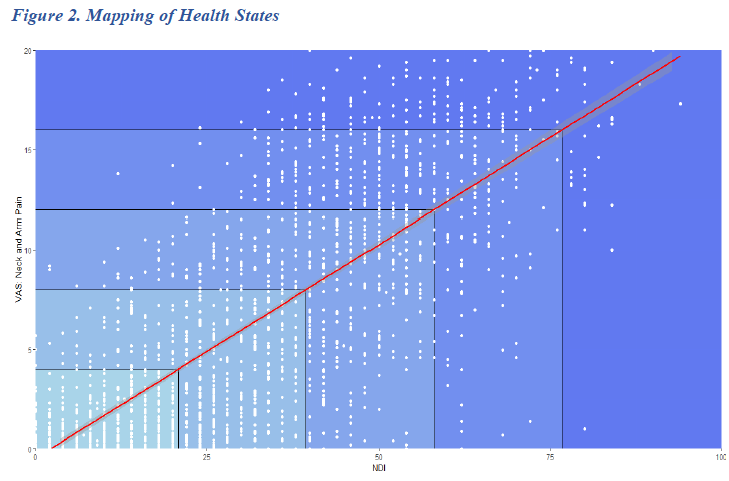


Supplementary Figure 1.

Health states generated via regression analysis of VAS and NDI. VAS, visual analog scale; NDI, neck disability index. VAS score was found to have strong correlation with NDI (Pearson's product-moment correlation: 0.797; p < 0.001).

Supplementary Figure 2. OWSA Results for Incremental Cost-effectiveness Ratio of i-Factor vs Control

Supplementary Figure 2.

Tornado diagram representing a one-way sensitivity analysis with ranges of the ICER in $/QALY, comparing i-Factor to control. ICER, incremental cost-effectiveness ratio; QALY, quality-adjusted life year.
